# Supplementary material
Source: publisher site journal article supplement (https://www.spandidos-publications.com/2201/downloadSupplementary)

Figure S1. GO analysis revealed significantly enriched terms ( $P < 0.05$ ) in the categories of (A) biological process, (B) cellular component and (C) molecular function by directed acyclic graph. Branches represent containment relationships. The boxes represent the top five GO terms of each category's enrichment degree. (D) KEGG pathway analysis. Genes are divided into seven branches according to the involved KEGG metabolic pathways: Cellular processes, environmental information processing, genetic information processing, human disease, metabolism, organism systems and drug development. GO, Gene Ontology; KEGG, Kyoto Encyclopedia of Genes and Genomes.

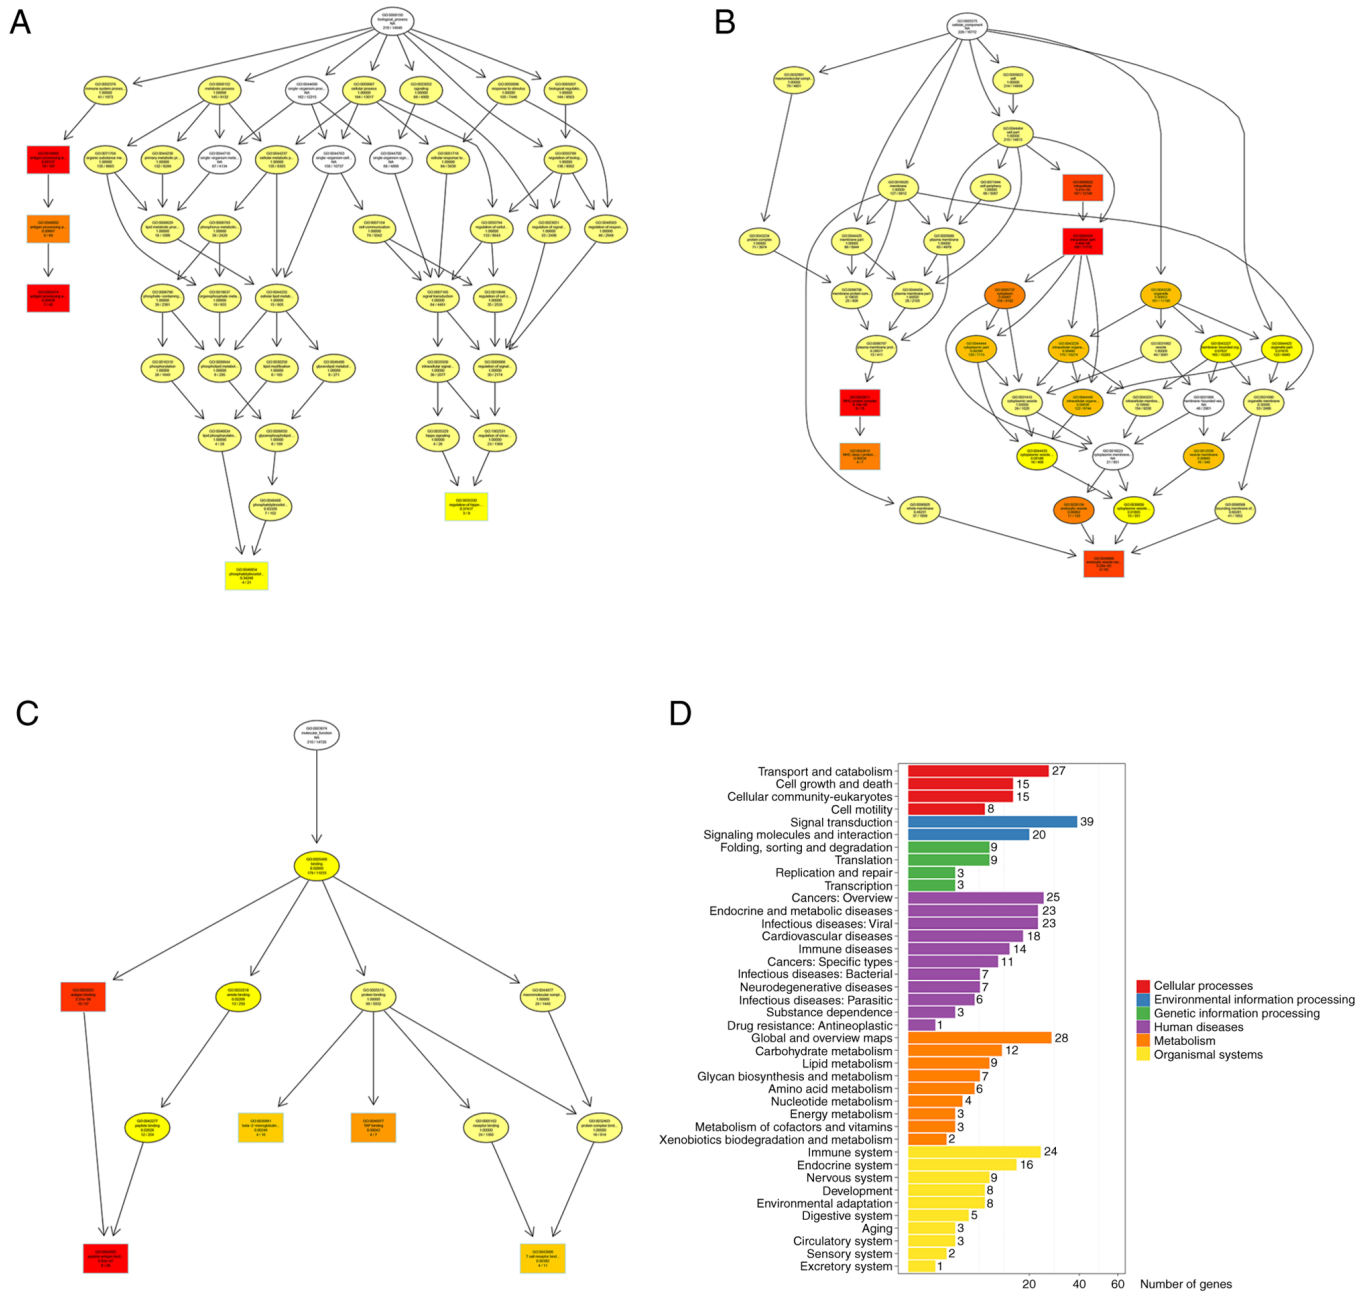

Supplement: Supplementary file 1 [file downloadSupplementary]
